# Supplementary material for: Related male Drosophila melanogaster reared together as larvae fight less and sire longer lived daughters
Source: PubMed Central journal article supplement (PMC4541986; doi:10.1002/ece3.1549), 2015-06-24

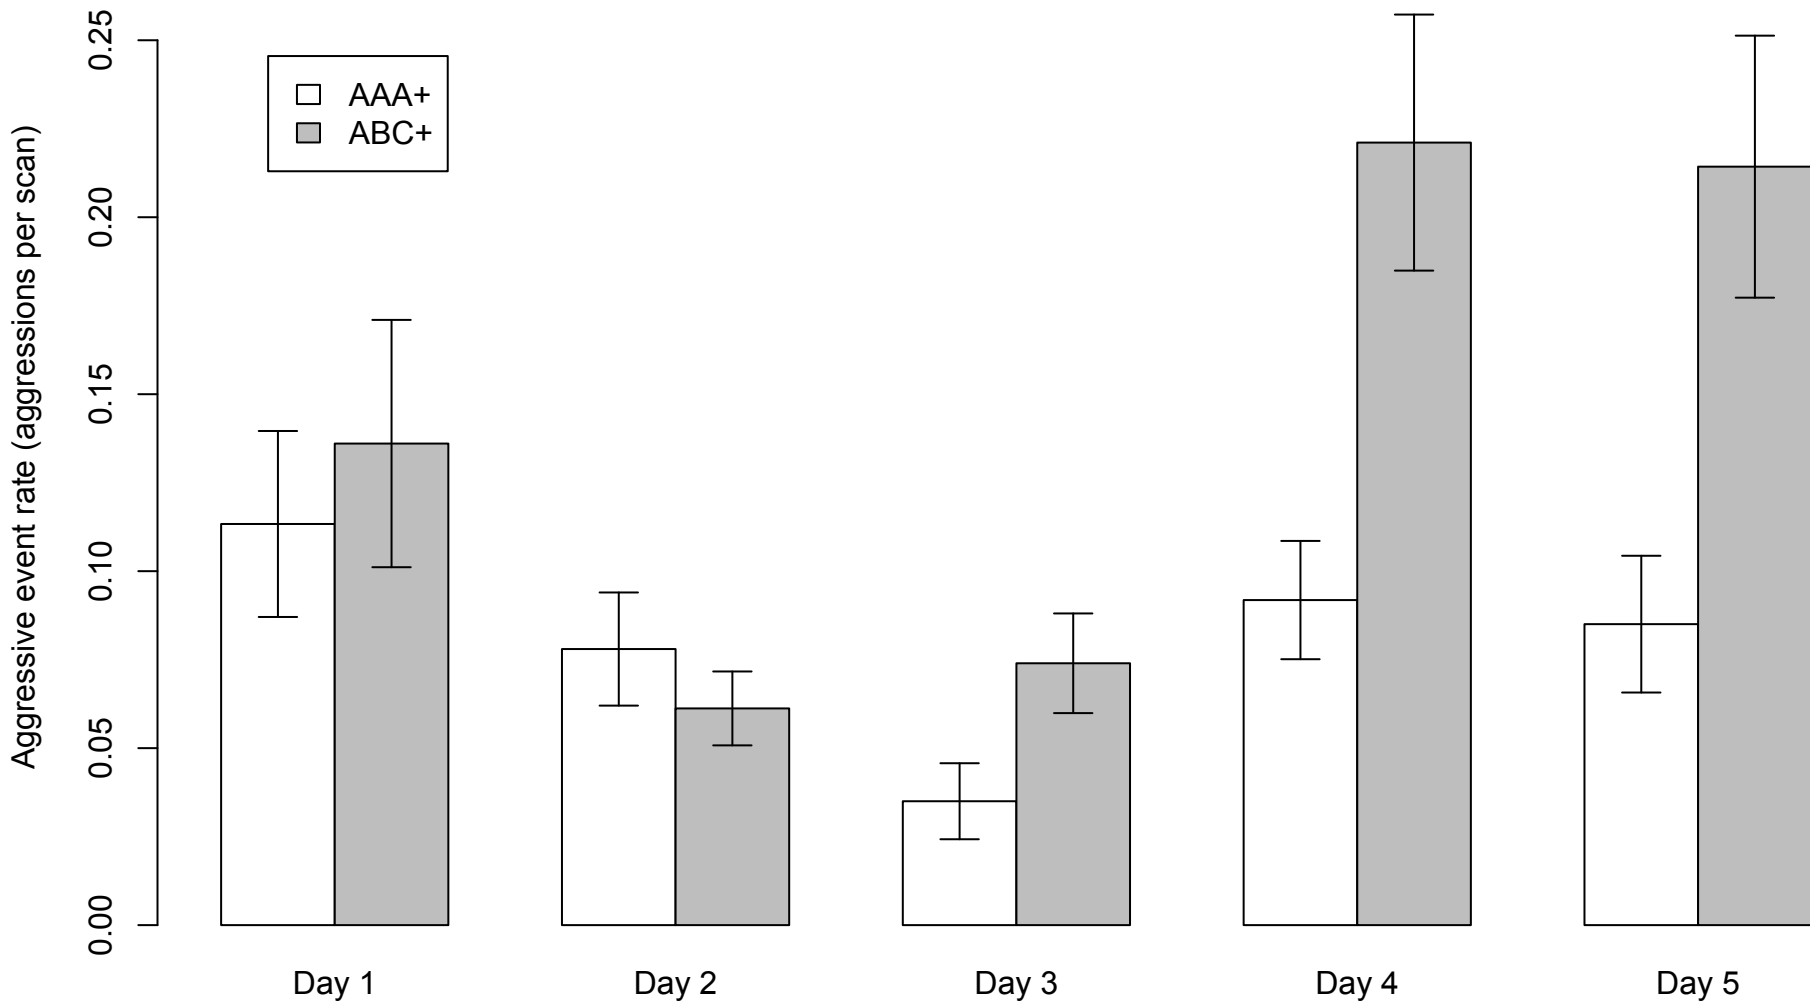

Supplement: ece30005-2787-sd1.pdf [file ece30005-2787-sd1.pdf]
